# Supplementary material
Source: publisher figshare collection journal article supplement (https://karger.figshare.com/ndownloader/files/24645614)
Supplement: Supplementary file 1 [file 24645614]

**Supplemental Material - Search terms within data-bases**

**PubMed**

| **Aspects** | **Search terms** |
| --- | --- |
| Aspect 1: Dementia | "Dementia"[Mesh] OR alzheimer*[tiab] OR dementi*[tiab] OR amenti*[tiab] OR community-dwell*[tiab] OR nursing home resident*[tiab] |
| Aspect 2: MSS | "Sensory Art Therapies"[Mesh] OR "Reflexotherapy"[Mesh] OR "Therapeutic Touch"[Mesh] OR "Milieu Therapy"[Mesh] OR "Horticultural Therapy"[Mesh] OR "Acupuncture Therapy"[Mesh] OR "Electric Stimulation Therapy"[Mesh] OR "Therapy, Soft Tissue"[Mesh] OR "Photic Stimulation"[Mesh] OR "Phototherapy"[Mesh] OR "Animal Assisted Therapy"[Mesh] OR environmental therap*[tiab] OR milieu therap*[tiab] OR environmental intervention*[tiab] OR environmental stimul*[tiab] OR sunlight exposure[tiab] OR solar exposure[tiab] OR multisensor*[tiab] OR multi-sensor*[tiab] OR sensory stimul*[tiab] OR sonas[tiab] OR snoezel*[tiab] OR sensory garden*[tiab] OR wander garden*[tiab] OR green home*[tiab] OR green hous*[tiab] OR auditory stimul*[tiab] OR acoustic stimul*[tiab] OR aromatherap*[tiab] OR aroma therap*[tiab] OR art therap*[tiab] OR color therap*[tiab] OR colour therap*[tiab] OR dance therap*[tiab] OR music therap*[tiab] OR play therap*[tiab] OR doll therap*[tiab] OR "toy therapy"[tiab] OR reflexotherap*[tiab] OR reflexo-therap*[tiab] OR reflex therap*[tiab] OR touch therap*[tiab] OR therapeutic touch[tiab] OR horticultural therap*[tiab] OR horticulture therap*[tiab] OR acupuncture therap*[tiab] OR electric stimulation therap*[tiab] OR electrostimulation therap*[tiab] OR soft tissue therap*[tiab] OR massage therap*[tiab] OR auditory therap*[tiab] OR acoustic therap*[tiab] OR aroma stimul*[tiab] OR olfactory stimul*[tiab] OR visual stimul*[tiab] OR photic stimul*[tiab] OR phototherap*[tiab] OR photo therap*[tiab] OR photo stimulat*[tiab] OR light therap*[tiab] OR light stimulat*[tiab] OR heliotherap*[tiab] OR animal assisted therap*[tiab] OR pet assisted therap*[tiab] OR animal therap*[tiab] OR pet therap*[tiab] OR sensorimotor stimul*[tiab] OR sensorimotor therap*[tiab] OR touch stimul*[tiab] OR acupuncture stimul*[tiab] OR massage stimul*[tiab] OR sound therap*[tiab] OR non-pharmacologic*[tiab] OR nonpharmacologic*[tiab] |
| Aspect 3: Sleep | "Sleep"[Mesh] OR "Sleep Wake Disorders"[Mesh] OR "Polysomnography"[Mesh] OR "Accelerometry"[Mesh] OR sleep*[tiab] OR insomni*[tiab] OR dyssomni*[tiab] OR parasomni*[tiab] OR hypersomni*[tiab] OR rest-activity[tiab] OR activity-rest[tiab] OR fatigue[tiab] OR circadian rhythm[tiab] OR somnolence[tiab] OR polysomnograph*[tiab] OR somnograph*[tiab] OR acceleromet*[tiab] OR actigraph*[tiab] OR actimetr*[tiab] OR Motionlogger[tiab] OR MotionWatch[tiab] OR ActTrust[tiab] OR Actiwatch[tiab] OR SOMNOwatch[tiab] OR SenseWear[tiab] OR BodyMedia[tiab] |

**Embase**

| **Aspects** | **Search terms** |
| --- | --- |
| Aspect 1: Dementia | 'dementia'/exp OR 'nursing home patient'/exp OR alzheimer*:ab,ti,kw OR dementi*:ab,ti,kw OR amenti*:ab,ti,kw OR 'community-dwell*':ab,ti,kw OR 'nursing home resident*':ab,ti,kw |
| Aspect 2: MSS | 'art therapy'/exp OR 'music therapy'/exp OR 'sound therapy'/exp OR 'milieu therapy'/exp OR 'dance therapy'/exp OR 'play therapy'/exp OR 'aromatherapy'/exp OR 'olfactory stimulation'/exp OR 'horticultural therapy'/exp OR 'acupuncture'/exp OR 'electrotherapy'/exp OR 'soft tissue therapy'/exp OR 'massage'/exp OR 'photostimulation'/exp OR 'phototherapy'/exp OR 'animal assisted therapy'/exp OR 'environmental therap*':ab,ti,kw OR 'milieu therap*':ab,ti,kw OR 'environmental intervention*':ab,ti,kw OR 'environmental stimul*':ab,ti,kw OR 'sunlight exposure':ab,ti,kw OR 'solar exposure':ab,ti,kw OR multisensor*:ab,ti,kw OR 'multi-sensor*':ab,ti,kw OR 'sensory stimul*':ab,ti,kw OR sonas:ab,ti,kw OR snoezel*:ab,ti,kw OR 'sensory garden*':ab,ti,kw OR 'wander garden*':ab,ti,kw OR 'green home*':ab,ti,kw OR 'green hous*':ab,ti,kw OR 'auditory stimul*':ab,ti,kw OR 'acoustic stimul*':ab,ti,kw OR aromatherap*:ab,ti,kw OR 'aroma therap*':ab,ti,kw OR 'art therap*':ab,ti,kw OR 'color therap*':ab,ti,kw OR 'colour therap*':ab,ti,kw OR 'dance therap*':ab,ti,kw OR 'music therap*':ab,ti,kw OR 'play therap*':ab,ti,kw OR 'doll therap*':ab,ti,kw OR 'toy therap*':ab,ti,kw OR reflexotherap*:ab,ti,kw OR 'reflexo-therap*':ab,ti,kw OR 'reflex therap*':ab,ti,kw OR 'touch therap*':ab,ti,kw OR 'therapeutic touch':ab,ti,kw OR 'horticultural therap*':ab,ti,kw OR 'horticulture therap*':ab,ti,kw OR 'acupuncture therap*':ab,ti,kw OR 'electric stimulation therap*':ab,ti,kw OR 'electrostimulation therap*':ab,ti,kw OR 'soft tissue therap*':ab,ti,kw OR 'massage therap*':ab,ti,kw OR 'auditory therap*':ab,ti,kw OR 'acoustic therap*':ab,ti,kw OR 'aroma stimul*':ab,ti,kw OR 'olfactory stimul*':ab,ti,kw OR 'visual stimul*':ab,ti,kw OR 'photic stimul*':ab,ti,kw OR phototherap*:ab,ti,kw OR 'photo therap*':ab,ti,kw OR 'photo stimulat*':ab,ti,kw OR 'light therap*':ab,ti,kw OR 'light stimulat*':ab,ti,kw OR heliotherap*:ab,ti,kw OR 'animal assisted therap*':ab,ti,kw OR 'pet assisted therap*':ab,ti,kw OR 'animal therap*':ab,ti,kw OR 'pet therap*':ab,ti,kw OR 'sensorimotor stimul*':ab,ti,kw OR 'sensorimotor therap*':ab,ti,kw OR 'touch stimul*':ab,ti,kw OR 'acupuncture stimul*':ab,ti,kw OR 'massage stimul*':ab,ti,kw OR 'sound therap*':ab,ti,kw OR 'non-pharmacologic*':ab,ti,kw OR nonpharmacologic*:ab,ti,kw |
| Aspect 3: Sleep | 'sleep'/exp OR 'sleep disorder'/exp OR 'polysomnography'/exp OR 'accelerometry'/exp OR 'actimetry'/exp OR sleep*:ab,ti,kw OR insomni*:ab,ti,kw OR dyssomni*:ab,ti,kw OR parasomni*:ab,ti,kw OR hypersomni*:ab,ti,kw OR 'rest-activity':ab,ti,kw OR 'activity-rest':ab,ti,kw OR fatigue:ab,ti,kw OR 'circadian rhythm':ab,ti,kw OR somnolence:ab,ti,kw OR polysomnograph*:ab,ti,kw OR somnograph*:ab,ti,kw OR acceleromet*:ab,ti,kw OR actigraph*:ab,ti,kw OR actimetr*:ab,ti,kw OR motionlogger:ab,ti,kw OR motionwatch:ab,ti,kw OR acttrust:ab,ti,kw OR actiwatch:ab,ti,kw OR somnowatch:ab,ti,kw OR sensewear:ab,ti,kw OR bodymedia:ab,ti,kw |

**Cochrane Library**

| **Aspects** | **Search terms** |
| --- | --- |
| Aspect 1: Dementia | alzheimer*:ab,ti,kw OR dementi*:ab,ti,kw OR amenti*:ab,ti,kw OR "community-dwell*":ab,ti,kw OR "nursing home resident*":ab,ti,kw |
| Aspect 2: MSS | "environmental therap*":ab,ti,kw OR "milieu therap*":ab,ti,kw OR "environmental intervention*":ab,ti,kw OR "environmental stimul*":ab,ti,kw OR "sunlight exposure":ab,ti,kw OR "solar exposure":ab,ti,kw OR multisensor*:ab,ti,kw OR "multi-sensor*":ab,ti,kw OR "sensory stimul*":ab,ti,kw OR sonas:ab,ti,kw OR snoezel*:ab,ti,kw OR "sensory garden*":ab,ti,kw OR "wander garden*":ab,ti,kw OR "green home*":ab,ti,kw OR "green hous*":ab,ti,kw OR "auditory stimul*":ab,ti,kw OR "acoustic stimul*":ab,ti,kw OR aromatherap*:ab,ti,kw OR "aroma therap*":ab,ti,kw OR "art therap*":ab,ti,kw OR "color therap*":ab,ti,kw OR "colour therap*":ab,ti,kw OR "dance therap*":ab,ti,kw OR "music therap*":ab,ti,kw OR "play therap*":ab,ti,kw OR "doll therap*":ab,ti,kw OR "toy therap*":ab,ti,kw OR reflexotherap*:ab,ti,kw OR "reflexo-therap*":ab,ti,kw OR "reflex therap*":ab,ti,kw OR "touch therap*":ab,ti,kw OR "therapeutic touch":ab,ti,kw OR "horticultural therap*":ab,ti,kw OR "horticulture therap*":ab,ti,kw OR "acupuncture therap*":ab,ti,kw OR "electric stimulation therap*":ab,ti,kw OR "electrostimulation therap*":ab,ti,kw OR "soft tissue therap*":ab,ti,kw OR "massage therap*":ab,ti,kw OR "auditory therap*":ab,ti,kw OR "acoustic therap*":ab,ti,kw OR "aroma stimul*":ab,ti,kw OR "olfactory stimul*":ab,ti,kw OR "visual stimul*":ab,ti,kw OR "photic stimul*":ab,ti,kw OR phototherap*:ab,ti,kw OR "photo therap*":ab,ti,kw OR "photo stimulat*":ab,ti,kw OR "light therap*":ab,ti,kw OR "light stimulat*":ab,ti,kw OR heliotherap*:ab,ti,kw OR "animal assisted therap*":ab,ti,kw OR "pet assisted therap*":ab,ti,kw OR "animal therap*":ab,ti,kw OR "pet therap*":ab,ti,kw OR "sensorimotor stimul*":ab,ti,kw OR "sensorimotor therap*":ab,ti,kw OR "touch stimul*":ab,ti,kw OR "acupuncture stimul*":ab,ti,kw OR "massage stimul*":ab,ti,kw OR "sound therap*":ab,ti,kw OR "non-pharmacologic*":ab,ti,kw OR nonpharmacologic*:ab,ti,kw |
| Aspect 3: Sleep | sleep*:ab,ti,kw OR insomni*:ab,ti,kw OR dyssomni*:ab,ti,kw OR parasomni*:ab,ti,kw OR hypersomni*:ab,ti,kw OR "rest-activity":ab,ti,kw OR "activity-rest":ab,ti,kw OR fatigue:ab,ti,kw OR "circadian rhythm":ab,ti,kw OR somnolence:ab,ti,kw OR polysomnograph*:ab,ti,kw OR somnograph*:ab,ti,kw OR acceleromet*:ab,ti,kw OR actigraph*:ab,ti,kw OR actimetr*:ab,ti,kw OR Motionlogger:ab,ti,kw OR MotionWatch:ab,ti,kw OR ActTrust:ab,ti,kw OR Actiwatch:ab,ti,kw OR SOMNOwatch:ab,ti,kw OR SenseWear:ab,ti,kw OR BodyMedia:ab,ti,kw |

**PsycINFO**

| **Aspects** | **Search terms** |
| --- | --- |
| Aspect 1: Dementia | DE "Dementia" OR DE "Senile Dementia" OR DE "Vascular Dementia" OR DE "Alzheimer's Disease" OR TI (alzheimer* OR dementi* OR amenti* OR "community-dwell*" OR "nursing home resident*") OR AB (alzheimer* OR dementi* OR amenti* OR "community-dwell*" OR "nursing home resident*") |
| Aspect 2: MSS | DE "Creative Arts Therapy" OR DE "Art Therapy" OR DE "Dance Therapy" OR DE "Music Therapy" OR DE "Milieu Therapy" OR DE "Aromatherapy" OR DE "Olfactory Stimulation" OR DE "Horticulture Therapy" OR DE "Tactual Stimulation" OR DE "Massage" DE "Acupuncture" OR DE "Electrical Stimulation" OR DE "Phototherapy" OR DE "Animal Assisted Therapy" OR DE "Play Therapy" OR DE "Doll Play" OR TI ("environmental therap*" OR "milieu therap*" OR "environmental intervention*" OR "environmental stimul*" OR "sunlight exposure" OR "solar exposure" OR multisensor* OR "multi-sensor*" OR "sensory stimul*" OR sonas OR snoezel* OR "sensory garden*" OR "wander garden*" OR "green home*" OR "green hous*" OR "auditory stimul*" OR "acoustic stimul*" OR aromatherap* OR "aroma therap*" OR "art therap*" OR "color therap*" OR "colour therap*" OR "dance therap*" OR "music therap*" OR "play therap*" OR "doll therap*" OR "toy therap*" OR reflexotherap* OR "reflexo-therap*" OR "reflex therap*" OR "touch therap*" OR "therapeutic touch" OR "horticultural therap*" OR "horticulture therap*" OR "acupuncture therap*" OR "electric stimulation therap*" OR "electrostimulation therap*" OR "soft tissue therap*" OR "massage therap*" OR "auditory therap*" OR "acoustic therap*" OR "aroma stimul*" OR "olfactory stimul*" OR "visual stimul*" OR "photic stimul*" OR phototherap* OR "photo therap*" OR "photo stimulat*" OR "light therap*" OR "light stimulat*" OR heliotherap* OR "animal assisted therap*" OR "pet assisted therap*" OR "animal therap*" OR "pet therap*" OR "sensorimotor stimul*" OR "sensorimotor therap*" OR "touch stimul*" OR "acupuncture stimul*" OR "massage stimul*" OR "sound therap*" OR "non-pharmacologic*" OR nonpharmacologic*) OR AB ("environmental therap*" OR "milieu therap*" OR "environmental intervention*" OR "environmental stimul*" OR "sunlight exposure" OR "solar exposure" OR multisensor* OR "multi-sensor*" OR "sensory stimul*" OR sonas OR snoezel* OR "sensory garden*" OR "wander garden*" OR "green home*" OR "green hous*" OR "auditory stimul*" OR "acoustic stimul*" OR aromatherap* OR "aroma therap*" OR "art therap*" OR "color therap*" OR "colour therap*" OR "dance therap*" OR "music therap*" OR "play therap*" OR "doll therap*" OR "toy therap*" OR reflexotherap* OR "reflexo-therap*" OR "reflex therap*" OR "touch therap*" OR "therapeutic touch" OR "horticultural therap*" OR "horticulture therap*" OR "acupuncture therap*" OR "electric stimulation therap*" OR "electrostimulation therap*" OR "soft tissue therap*" OR "massage therap*" OR "auditory therap*" OR "acoustic therap*" OR "aroma stimul*" OR "olfactory stimul*" OR "visual stimul*" OR "photic stimul*" OR phototherap* OR "photo therap*" OR "photo stimulat*" OR "light therap*" OR "light stimulat*" OR heliotherap* OR "animal assisted therap*" OR "pet assisted therap*" OR "animal therap*" OR "pet therap*" OR "sensorimotor stimul*" OR "sensorimotor therap*" OR "touch stimul*" OR "acupuncture stimul*" OR "massage stimul*" OR "sound therap*" OR "non-pharmacologic*" OR nonpharmacologic*) |
| Aspect 3: Sleep | DE "Sleep" OR DE "Sleep Disorders" OR DE "Hypersomnia" OR DE "Insomnia" OR DE "Parasomnias" OR DE "Polysomnography" OR DE "Sleep Wake Cycle" OR DE "Actigraphy" OR TI (sleep* OR insomni* OR dyssomni* OR parasomni* OR hypersomni* OR "rest-activity" OR "activity-rest" OR fatigue OR "circadian rhythm" OR somnolence OR polysomnograph* OR somnograph* OR acceleromet* OR actigraph* OR actimetr* OR Motionlogger OR MotionWatch OR ActTrust OR Actiwatch OR SOMNOwatch OR SenseWear OR BodyMedia) OR AB (sleep* OR insomni* OR dyssomni* OR parasomni* OR hypersomni* OR "rest-activity" OR "activity-rest" OR fatigue OR "circadian rhythm" OR somnolence OR polysomnograph* OR somnograph* OR acceleromet* OR actigraph* OR actimetr* OR Motionlogger OR MotionWatch OR ActTrust OR Actiwatch OR SOMNOwatch OR SenseWear OR BodyMedia) |

**CINAHL**

| **Aspects** | **Search terms** |
| --- | --- |
| Aspect 1: Dementia | MH "Dementia+" OR TI (alzheimer* OR dementi* OR amenti* OR "community-dwell*" OR "nursing home resident*") OR AB (alzheimer* OR dementi* OR amenti* OR "community-dwell*" OR "nursing home resident*") |
| Aspect 2: MSS | MH "Art Therapy" OR MH "Dance Therapy" OR MH "Music Therapy" OR MH "Aromatherapy" OR MH "Play Therapy" OR MH "Therapeutic Touch" OR MH "Massage+" OR MH "Socioenvironmental Therapy+" OR MH "Acupuncture" OR MH "Electrotherapy+" OR MH "Phototherapy+" OR MH "Pet Therapy+" OR TI ("environmental therap*" OR "milieu therap*" OR "environmental intervention*" OR "environmental stimul*" OR "sunlight exposure" OR "solar exposure" OR multisensor* OR "multi-sensor*" OR "sensory stimul*" OR sonas OR snoezel* OR "sensory garden*" OR "wander garden*" OR "green home*" OR "green hous*" OR "auditory stimul*" OR "acoustic stimul*" OR aromatherap* OR "aroma therap*" OR "art therap*" OR "color therap*" OR "colour therap*" OR "dance therap*" OR "music therap*" OR "play therap*" OR "doll therap*" OR "toy therap*" OR reflexotherap* OR "reflexo-therap*" OR "reflex therap*" OR "touch therap*" OR "therapeutic touch" OR "horticultural therap*" OR "horticulture therap*" OR "acupuncture therap*" OR "electric stimulation therap*" OR "electrostimulation therap*" OR "soft tissue therap*" OR "massage therap*" OR "auditory therap*" OR "acoustic therap*" OR "aroma stimul*" OR "olfactory stimul*" OR "visual stimul*" OR "photic stimul*" OR phototherap* OR "photo therap*" OR "photo stimulat*" OR "light therap*" OR "light stimulat*" OR heliotherap* OR "animal assisted therap*" OR "pet assisted therap*" OR "animal therap*" OR "pet therap*" OR "sensorimotor stimul*" OR "sensorimotor therap*" OR "touch stimul*" OR "acupuncture stimul*" OR "massage stimul*" OR "sound therap*" OR "non-pharmacologic*" OR nonpharmacologic*) OR AB ("environmental therap*" OR "milieu therap*" OR "environmental intervention*" OR "environmental stimul*" OR "sunlight exposure" OR "solar exposure" OR multisensor* OR "multi-sensor*" OR "sensory stimul*" OR sonas OR snoezel* OR "sensory garden*" OR "wander garden*" OR "green home*" OR "green hous*" OR "auditory stimul*" OR "acoustic stimul*" OR aromatherap* OR "aroma therap*" OR "art therap*" OR "color therap*" OR "colour therap*" OR "dance therap*" OR "music therap*" OR "play therap*" OR "doll therap*" OR "toy therap*" OR reflexotherap* OR "reflexo-therap*" OR "reflex therap*" OR "touch therap*" OR "therapeutic touch" OR "horticultural therap*" OR "horticulture therap*" OR "acupuncture therap*" OR "electric stimulation therap*" OR "electrostimulation therap*" OR "soft tissue therap*" OR "massage therap*" OR "auditory therap*" OR "acoustic therap*" OR "aroma stimul*" OR "olfactory stimul*" OR "visual stimul*" OR "photic stimul*" OR phototherap* OR "photo therap*" OR "photo stimulat*" OR "light therap*" OR "light stimulat*" OR heliotherap* OR "animal assisted therap*" OR "pet assisted therap*" OR "animal therap*" OR "pet therap*" OR "sensorimotor stimul*" OR "sensorimotor therap*" OR "touch stimul*" OR "acupuncture stimul*" OR "massage stimul*" OR "sound therap*" OR "non-pharmacologic*" OR nonpharmacologic*) |
| Aspect 3: Sleep | MH "Sleep+" OR MH "Sleep Disorders+" OR MH "Polysomnography" OR MH "Accelerometry+" OR TI (sleep* OR insomni* OR dyssomni* OR parasomni* OR hypersomni* OR "rest-activity" OR "activity-rest" OR fatigue OR "circadian rhythm" OR somnolence OR polysomnograph* OR somnograph* OR acceleromet* OR actigraph* OR actimetr* OR Motionlogger OR MotionWatch OR ActTrust OR Actiwatch OR SOMNOwatch OR SenseWear OR BodyMedia) OR AB (sleep* OR insomni* OR dyssomni* OR parasomni* OR hypersomni* OR "rest-activity" OR "activity-rest" OR fatigue OR "circadian rhythm" OR somnolence OR polysomnograph* OR somnograph* OR acceleromet* OR actigraph* OR actimetr* OR Motionlogger OR MotionWatch OR ActTrust OR Actiwatch OR SOMNOwatch OR SenseWear OR BodyMedia) |
